# Supplementary material for: HABIT: Health visitors delivering Advice in Britain on Infant Toothbrushing – an early-phase feasibility study of a complex oral health intervention
Source: HighWire-hosted journal article supplement (doi:10.1136/bmjopen-2021-059665), 2022-10-01
Supplement: bmjopen-2021-059665supp002_data_supplement.pdf [file bmjopen-2021-059665supp002_data_supplement.pdf]

**Supplementary Item 2 – Dietary Data**

Frequency of food and drinks averaged for all participants across the 3 data collection visits, coded using the following key: 0 - None; 1 - less than once a month; 2 - 1-3 time per month; 3 – once per week; 4 – 2-4 times per week; 5 – 5-6 times per week; 6 once per day; 7 – 2-3 times per day; 8 – 4-5 times per day; 9 – 6 or more times a day

|                | Median Frequency   |                               |                                |
|----------------|--------------------|-------------------------------|--------------------------------|
|                | Baseline<br>(n=27) | 2 Week<br>Follow-Up<br>(n=26) | 3 Month<br>Follow-Up<br>(n=26) |
| Water          | 7                  | 8                             | 7                              |
| Milk           | 7                  | 7                             | 7                              |
| Sugared drinks | 0                  | 0                             | 0                              |
| Cakes          | 0                  | 0                             | 0                              |
| Biscuits       | 4                  | 4                             | 2                              |
| Sweets         | 0                  | 0                             | 1                              |
| Fresh Fruit    | 7                  | 7                             | 7                              |
| Vegetables     | 7                  | 7                             | 6                              |
